# Supplementary material
Source: Research Square preprint supplement (doi:10.21203/rs.3.rs-10158013/v1)
Supplement: Supplementary file 1 [file 7585f7b110b9feb0cfb3bb3a.docx]

**3.1.2 Partitioning of Genetic Diversity Based on Shannon Information Across Climatic Zones**

**b**

**a**

**Figure 1 (a)** Partitioning of Shannon Information (sH) Among and Within *P. falciparum* Populations Across Climatic Zones and (**b)** Scaled Diversity (D′) and Genetic Overlap (O′) Within and Among Climatic Populations. Pops: population

**3.2.2 Partitioning of Genetic Diversity Among and Within Populations**

**b**

**a**

**Figure 4: (a)Partitioning of Shannon information**. **(b) Scaled diversity (D') and overlap (O') indices of** dry season duration.

**3.3.2 Partitioning of Genetic Diversity Across Elevation Gradients**

**a**

**Figure 7a. Percent Partitioning of Shannon Information Within and Among *Plasmodium falciparum* Populations Stratified by Elevation**. *The figure illustrates the proportion of total Shannon diversity partitioned into within- and among-population components. Elevated zones (400–800 m) exhibit the largest within-population contribution, suggesting locally structured diversity, whereas coastal/lowland populations show limited internal variation and low overall diversity.* **Figure 7b. Scaled Diversity (D′) and Genetic Overlap (O′) Across Elevation-Defined Populations**. *Scaled diversity (D′) reflects the relative level of genetic differentiation among populations, while overlap (O′ = 1 – D′) indicates the extent of shared allelic composition. The inverse relationship between D′ and O′ demonstrates that higher-altitude populations maintain moderate differentiation but still exhibit substantial allelic overlap with lowland populations, implying effective gene flow across altitudinal gradients.*

**3.4.2 Partitioning of Genetic Diversity by Humidity Levels**

**a**

**Figure 10a. Percent Partitioning of Shannon Information Within and Among *Plasmodium falciparum* Populations by Humidity Level**. *The pie chart illustrates the proportion of total Shannon diversity partitioned into within- (89%) and among-population (11%) components. The dominance of within-population variation indicates that most genetic diversity is maintained internally, with minor differentiation between populations from high and moderate humidity regions.* **Figure 10b. Scaled Diversity (D′) and Genetic Overlap (O′) Between *Plasmodium falciparum* Populations Stratified by Humidity**. *The bar plot compares scaled diversity (D′) and genetic overlap (O′ = 1 – D′) between humidity-defined populations. The high O′ values (>0.90) reflect substantial allelic sharing and overlap, suggesting that humidity-driven differentiation exerts only a modest influence on the overall genetic structure of P. falciparum populations.*

**3.5.2 Partitioning of Genetic Diversity Across Rainfall Zones**

**b**

**a**

**Figure 13a. Partitioning of Shannon Information Within and Among *Plasmodium falciparum* Populations Grouped by Rainfall**. *The pie chart shows the proportion of Shannon diversity attributable to within- (75%) and among-population (25%) components. The predominance of within-population variation implies that most genetic diversity is retained within rainfall-defined populations rather than between them.* **Figure 13b. Scaled Genetic Diversity (D′) and Allelic Overlap (O′) Between Rainfall-Based Population Groups**. *The horizontal bar plot compares scaled genetic diversity (D′) and overlap (O′ = 1 − D′) between rainfall-defined P. falciparum populations. High O′ values (>0.90) indicate extensive allelic sharing and minimal differentiation across rainfall gradients, emphasizing the homogenizing influence of gene flow.*

**3.6.2 Partitioning of Genetic Diversity Across Temperature Zones**

**b**

**a**

**Figure 16a. Proportional Partitioning of Shannon Information Within and Among *P. falciparum* Populations Stratified by Temperature.** *The pie chart displays the proportion of total Shannon diversity explained by within-population (89%) versus among-population (11%) variation. The dominance of within-population information supports the notion that temperature gradients exert minimal structuring effects on P. falciparum population diversity across sampling sites.* **Figure 16b. Scaled Genetic Diversity (D′) and Allelic Overlap (O′) Among Temperature-Defined *P. falciparum* Populations.** *The stacked bar chart compares scaled genetic diversity (D′) and genetic overlap (O′ = 1 – D′) within and among populations across temperature ranges. High overlap values (O′ ≈ 0.93–0.98) demonstrate that allelic composition remains nearly identical across thermal zones, suggesting the parasite’s adaptive resilience and broad thermal tolerance in maintaining gene flow.*
